# Supplementary material for: Reusable Plastic Crates (RPCs) for Fresh Produce (Case Study on Cauliflowers): Sustainable Packaging but Potential Salmonella Survival and Risk of Cross-Contamination
Source: Foods. 2021 Jun 1;10(6):1254. doi: 10.3390/foods10061254 (PMC8228333; doi:10.3390/foods10061254)
Supplement: Supplementary file 1 [file foods-10-01254-s001.zip › foods-1232826-supplementary.pdf]

## Supplementary information

**Table S1.** Characteristics of the cauliflowers used in the experiments. SD: standard deviation.

\*Measurement from stem cut to apex.

| Parameter | Mean $\pm$ SD | Units |
|-----------|---------------|-------|
| Weight    | 308 $\pm$ 72  | g     |
| Height*   | 7.7 $\pm$ 0.9 | cm    |
| Diameter  | 9.4 $\pm$ 0.7 | cm    |

**Table S2.** Detailed assessment of the transfer of *Salmonella* from pieces of different materials to non-inoculated cauliflowers.

| Experiment | cfu/piece<br>of box or crate | Predicted cfu/g in<br>cross-contaminated<br>cauliflowers | Observed cfu/g in<br>cross-contaminated<br>cauliflowers |
|------------|------------------------------|----------------------------------------------------------|---------------------------------------------------------|
| PP         | 38                           | 0.25                                                     | <5                                                      |
| Cardboard  | 169                          | 1.1                                                      | <5                                                      |
| Fiberboard | 15                           | 0.1                                                      | <5                                                      |

Assumptions and data for the calculations: All the cfu are transferred from the pieces to the non-inoculated cauliflowers. There is a homogeneous distribution of the cfu in the non-inoculated cauliflowers. Weight of the apical half of the cauliflowers: 300 g/2= 150 g. Surface area of the pieces = 12.25 cm<sup>2</sup>. PP: polypropylene.

### *Experiment with PP*

The mean number of cfu in a PP piece was  $10^{0.49}$  cfu/cm<sup>2</sup> \* 12.25 cm<sup>2</sup> ≈ 38 cfu. Assuming that all the cfu are transferred from the PP piece to the non-inoculated cauliflowers, a homogeneous distribution in the non-inoculated cauliflowers, and estimating a weight of 150 g for the apical half of the cauliflowers (see S1) the population in the cross-contaminated cauliflowers would be 38 cfu/150 g ≈ 0.25 cfu/g. In this case, the result of the analysis indicated a level of *Salmonella* <5 cfu/g in the cross-contaminated cauliflowers, which concurs with the prediction based on the level detected in the PP pieces.

### *Experiment with cardboard*

The mean number of cfu in a cardboard piece was  $10^{1.14}$  cfu/cm<sup>2</sup> \* 12.25 cm<sup>2</sup> ≈ 169 cfu. Assuming that all the cfu are transferred from the PP piece to the non-inoculated cauliflowers, a homogeneous distribution in the non-inoculated cauliflowers, and estimating a weight of 150 g for the apical half of the cauliflowers (see S1) the population in the cross-contaminated cauliflowers would be 169 cfu/150 g ≈ 1.1 cfu/g. In this case, the result of the analysis indicated a level of *Salmonella* <5 cfu/g in the cross-contaminated cauliflowers, which concurs with the prediction based on the level detected in the cardboard pieces.

### *Experiment with fiberboard*

The mean number of cfu in a fiberboard piece was  $10^{0.1}$  cfu/cm<sup>2</sup> \* 12.25 cm<sup>2</sup> ≈ 15 cfu. Assuming that all the cfu are transferred from the PP piece to the non-inoculated cauliflowers, a homogeneous distribution in the non-inoculated cauliflowers, and estimating a weight of 150 g for the apical half of the cauliflowers (see S1) the population in the cross-contaminated cauliflowers would be 15 cfu/150 g ≈ 0.1 cfu/g. In this case, the result of the analysis indicated a level of *Salmonella* <5 cfu/g in the cross-contaminated cauliflowers, which concurs with the prediction based on the level detected in the fiberboard pieces.
